# Supplementary material
Source: PubMed Central journal article supplement (PMC2914474)
Supplement: NIHMS218913-supplement-01.pdf [file NIHMS218913-supplement-01.pdf]

## Inventory of Supplemental Information

| Supplementary Item      | Notes                                                                                                                                                                           |
|-------------------------|---------------------------------------------------------------------------------------------------------------------------------------------------------------------------------|
| Supplementary Table S1  | Contains all human and mouse bioinformatically predicted near-perfect miRNA target sites that were used to select candidates for validation in Figure 1                         |
| Supplementary Table S2  | Lists the sequenced reads and their abundances with 10nt overlaps to predicted miRNA target sites with 2 or fewer non-GU mismatches. These data were used to generate Figure 3. |
| Supplementary Figure S1 | Abundances of sequenced reads with overlaps to predicted miRNA target sites with up to 5 non-GU mismatches. Shown in contrast to Figure 3.                                      |
| Supplementary Figure S2 | Validation of human Plekhm1 cleavage by mir-106b by 5` RACE in human 293S cells, in addition to mouse ES cells in Figure 4.                                                     |
| Supplementary Figure S3 | A sequence alignment showing the location of the Dgcr8 cleavage site shown in Figure 5 relative to the sites identified in Han et al, 2009.                                     |
| Supplementary Table S3  | All identified Drosha-dependent cleavage sites (examples of which are shown in Figure 5)                                                                                        |
| Supplementary Table S4  | All identified mRNA cleavage sites (examples of which are shown in Figure 6)                                                                                                    |
| Supplementary Figure S4 | Validation of human TRA2A cleavage (which is shown in Figure 6)                                                                                                                 |

## Supplementary Tables and Figures

**Supplementary Table S1.** All human and mouse predicted miRNA cleavage sites.

See file:

Supplementary Table S1 - Final near-perfect miRNA target predictions.xls

**Supplementary Table S2.** Sequenced reads and their abundances with 10nt overlaps to predicted miRNA binding sites with 2 or fewer non-GU mismatches.

See file:

Supplementary Table S2 - 10nt overlaps with 2nonGUmm or less predictions.xls

**Supplementary Table S3.** Identified Drosha-dependent cleavage sites with a 5% false discovery rate.

See file:

Supplementary Table S3 - Drosha-dependent cleavage sites q0.05.xls

**Supplementary Table S4.** All identified mRNA cleavage sites.

See file:

Supplementary Table S4 - Overall cleavage sites.xls

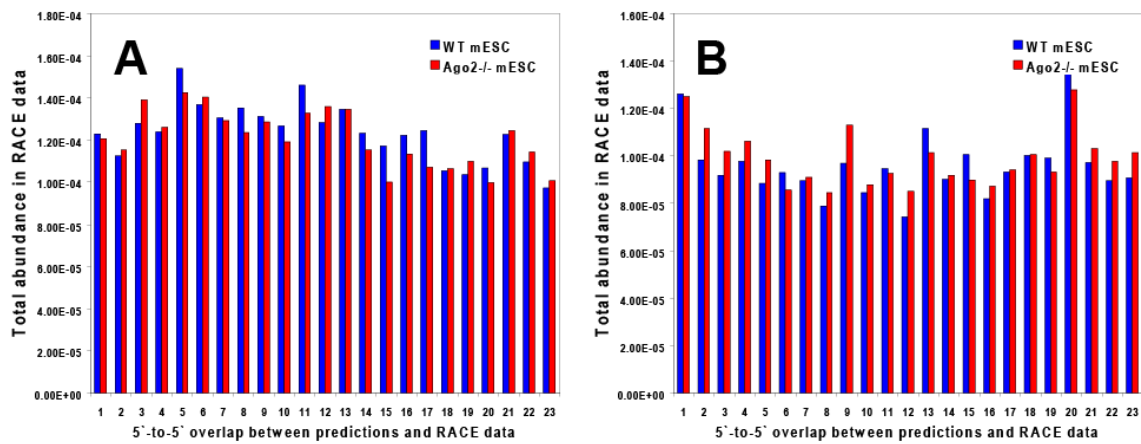

**Supplementary Figure S1.** Overlap between the 5` end of miRNAs at predicted target sites and the 5` end of RACE tags. (A) Abundance of RACE tags with indicated overlap for real miRNA target predictions with up to 5 non-GU mismatches. (B) Same as in (A), but for randomized miRNA predictions.

**A**  
**hPlekhm1 5` - P - RACE**

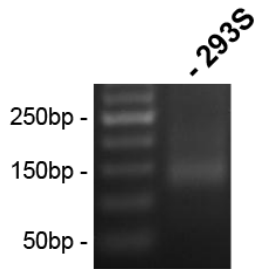

**B**

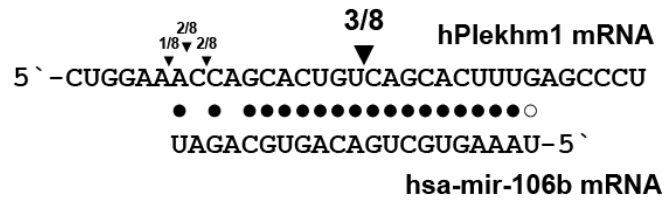

**Supplementary Figure S2.** Validation of human Plekhm1 cleavage by mir-106b by 5` RACE in 293S cells. (A) Nested PCR of the 5` RACE produces an amplicon of the expected size for hPlekhm1. (B) Cloning and sequencing of the PCR amplicon indicates products corresponding to the expected miRNA cleavage site.

```

          190      200      210      220      230      240      250      260      270
human Dgcr8 mRNA  AGCTGCTACATTAAAGAAAAGAGCAATGTGGCCAGCTTGAAGCCGCCAGCGC--ACAGCGGG-CAGGACGCGCCGGGTCT
mouse Dgcr8 mRNA  AGCTGCTACATTAAAGAAAAGAGCAATGTGGCCAGCTTGAAGCCGCCAGTGTGTACAGCGGGGAGGACGACACCGGGTCT
mouse Dgcr8 RACE tag  ~~~~~~ATGTGGCCAGCTTGAAGCCGCCAGTGTGTACAG
Han et al site A2 3' fragment ~~~~~~TGTGGC.....
Han et al site A1 3' fragment ~~~~~~GCTG.....

```

**Supplementary Figure S3.** Alignment of human and mouse Dgcr8 mRNA with the abundant experimental RACE tag and cleavage sites determined by Han et al, 2009.

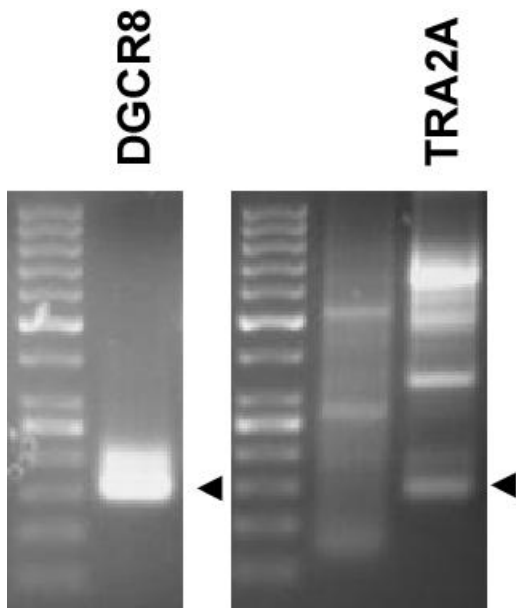

**Supplementary Figure S4.** Validation of human DGCR8 and TRA2A cleavage sites by 5` RACE in 293S cells. The expected amplicon is indicated by a triangle. For DGCR8, 22/23 clones match the global RACE site; for TRA2A, 11/21 clones match and 10/21 clones begin 1 nucleotide to the 5` end.

# Supplementary Materials and Methods

## Primers and oligonucleotide linkers

|                             |                                                                   |
|-----------------------------|-------------------------------------------------------------------|
| LYPD3-151-5`Race            | CAAAGTAATTAATCTTTATTGAGGCATTTATGTGCCAGA                           |
| LYPD3-151-5`RaceNest        | GAGGCATTTATGTGCCAGAACTGATCACA                                     |
| ATPAF1-151-5`Race           | CAACAAAAAAGTGTATCTTCTATGGTCCAGGCCA                                |
| ATPAF1-151-5`RaceNest       | CTTCTATGGTCCAGGCCATGTCCTT                                         |
| mPfkfb1-let7c-5`RACE        | CTAGTCCACACCTTCAGGGAGCTGATG                                       |
| mPfkfb1-let7c-5`RACEnest    | TGAGACCGAATGAAGTTGGCCAG                                           |
| mPfkfb1-let7c-5`RACE2       | CCAGAGTCACCTCCAATGCGGC                                            |
| mPfkfb1-let7c-5`RACEnest2   | GCCTCTAAGGTTGAGTTCACTCTCACC                                       |
| mPlekhm1-mir106b-5`RACE     | GTGAGACTAAGGGTGGTGAAGCTCTGC                                       |
| mPlekhm1-mir106b-5`RACEnest | GCAGCTTTGGGGCAAATTCTCCTC                                          |
| hPlekhm1-mir106b-5`RACE     | CAAGGTGGGCCTGGAGCATCTG                                            |
| hPlekhm1-mir106b-5`RACEnest | CAGCGCCCCTGTCTGTAGAG                                              |
| SBS3 (RNA)                  | ACACUCUUUCCCUACACGACGCUCUUCGGAUC                                  |
| SBS8-N6                     | CGGTCTCGGCATTCTGCTGAACCGCTCTTCCGATCTNNNNNN                        |
| PE-P5-SBS3                  | AATGATACGGCGACCACCGAGATCTACACTCTTTCCCTACACGA<br>CGCTCTTCCGATC     |
| PE-P7-SBS8                  | CAAGCAGAAGACGGCATAACGAGATCGGTCTCGGCATTCTGCTG<br>AACCGCTCTTCCGATCT |
